# Supplementary figures and images for: Are disulfide bonds resilient to double ionization? Insights from coincidence spectroscopy and ab initio calculations
Source: Royal Society of Chemistry journal article supplement (doi:10.1039/d0ra05979j), 2020-01-01

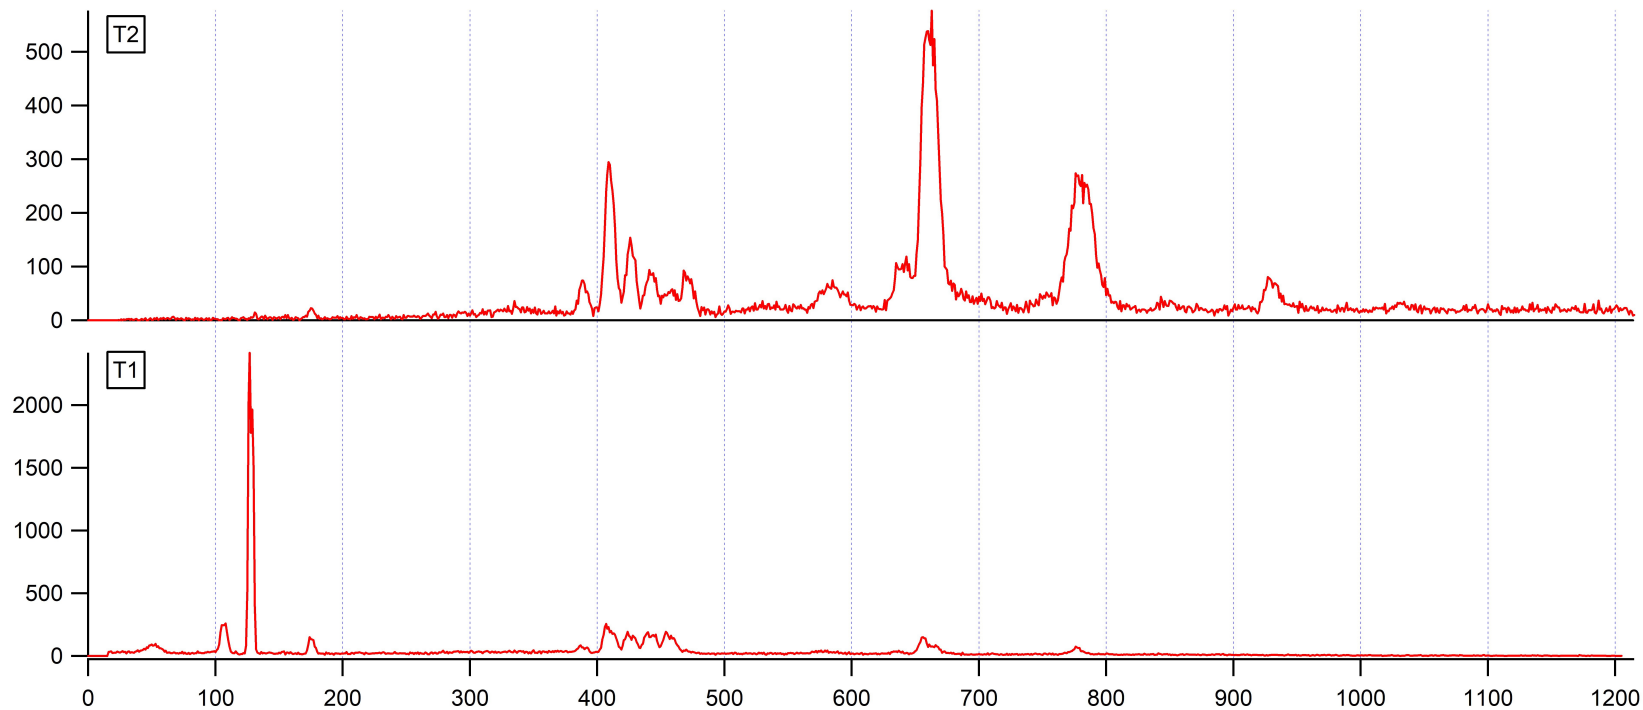

Supplement: d0ra05979j1.pdf [file d0ra05979j1.pdf]

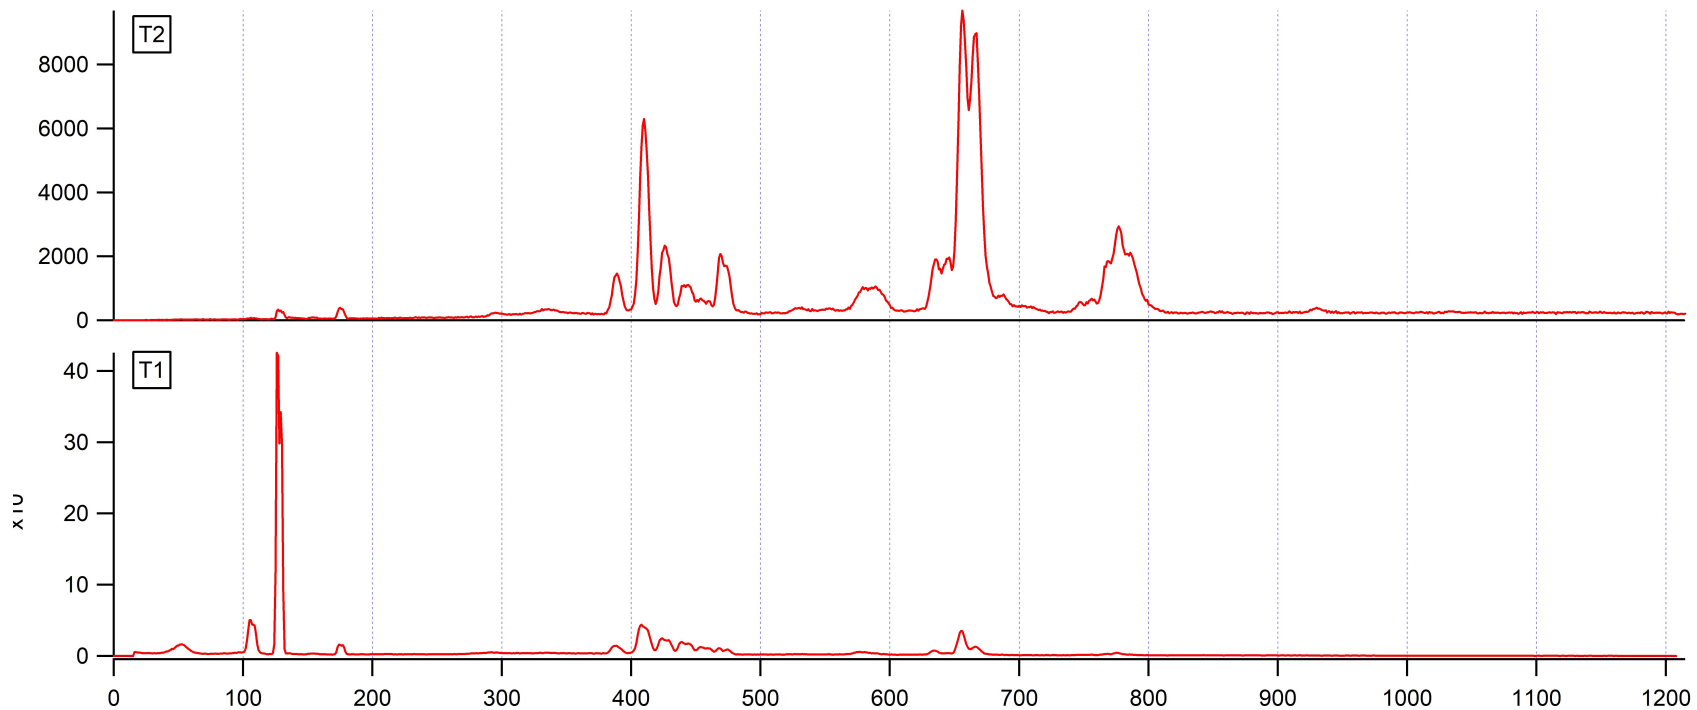

Supplement: d0ra05979j2.pdf [file d0ra05979j2.pdf]
